# Supplementary material for: Significant improvement of the lithium-ion conductivity of solid-state electrolytes by fabricating large pore volume hollow ZIF-8
Source: Royal Society of Chemistry journal article supplement (doi:10.1039/d1dt01904j), 2021-01-01
Supplement: d1dt01904j1.pdf [file d1dt01904j1.pdf]

## Electronic Supplementary Information

# Significantly Improve the Lithium-Ion Conductivity of Solid-State Electrolytes via Fabricating Large Pore Volume Hollow ZIF-8

Li Tian <sup>a</sup>, Zixin Liu <sup>a</sup>, Fencheng Tao <sup>a</sup>, Meiyong Liu <sup>a</sup> and Zhiliang Liu <sup>a</sup> \*

<sup>a</sup> College of Chemistry and Chemical Engineering, Inner Mongolia University, Hohhot 010021,

P.R. China. E-mail: cezlliu@imu.edu.cn; Fax: +86-471-4992261; Tel: +86-471-4992261

## Contents

**Figure S1.** Optical photographs of electrolyte membrane.

**Figure S2.** TGA curves of ZIF-8 and hollow ZIF-8.

**Figure S3.** XPS spectra of survey of hollow ZIF-8.

**Figure S4.** EIS of hollow ZIF-8 at temperature from  $-20$  to  $100^{\circ}\text{C}$ .

**Figure S5.** CV curves of ss/electrolyte membrane/Li cell of hollow ZIF-8.

**Figure S6.** Specific capacity and coulombic efficiency of  $\text{LiFePO}_4$ /electrolyte membrane/Li cell of hollow ZIF-8 with  $0.1\text{ C}$  charge/discharge rate at room temperature.

**Table S1.** Comparison of MOFs for solid-state lithium ion conduction at room temperature.

## References

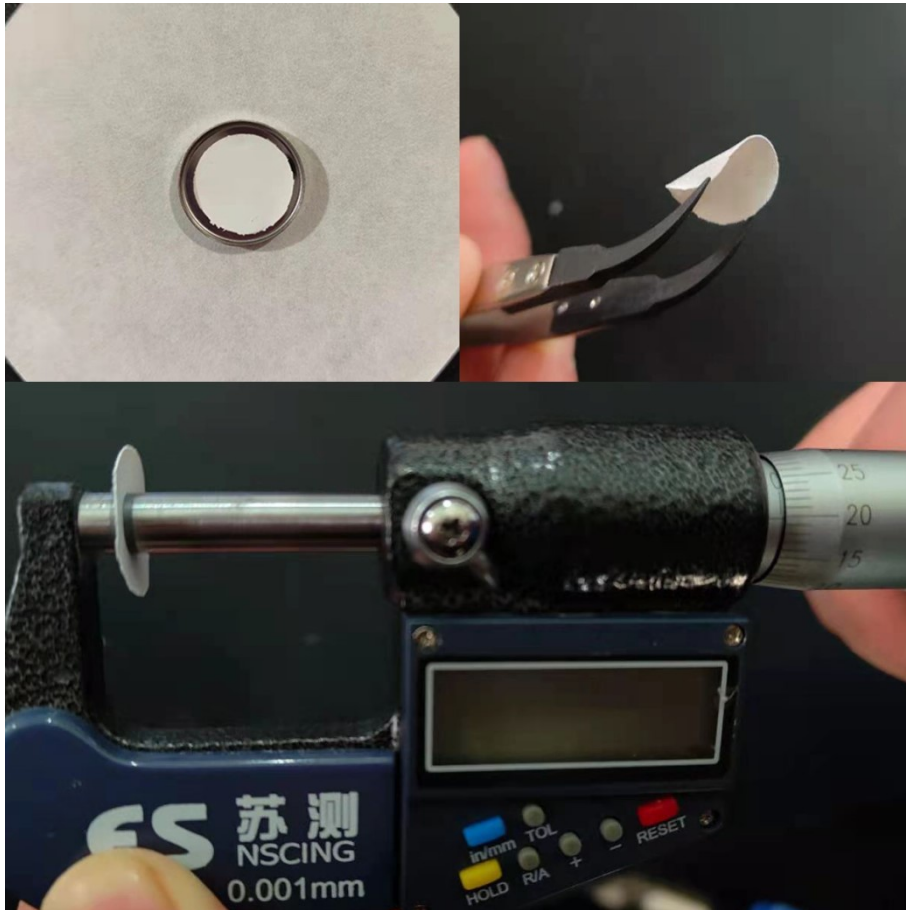

**Figure S1.** Optical photographs of electrolyte membrane

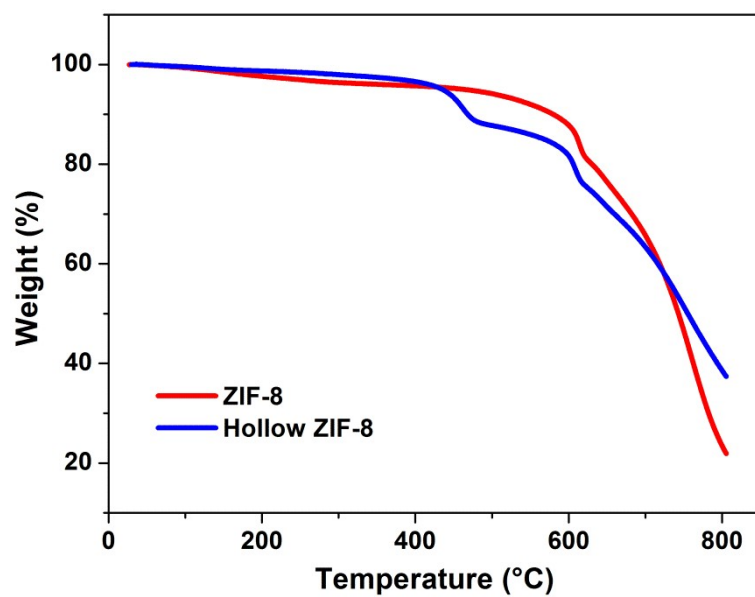

**Figure S2.** TGA curves of ZIF-8 and hollow ZIF-8.

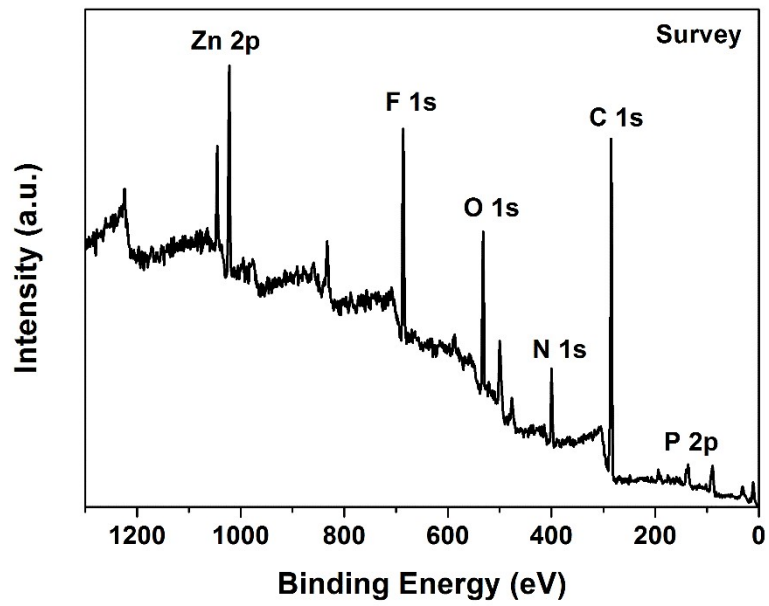

Figure S3. XPS spectra of survey of hollow ZIF-8

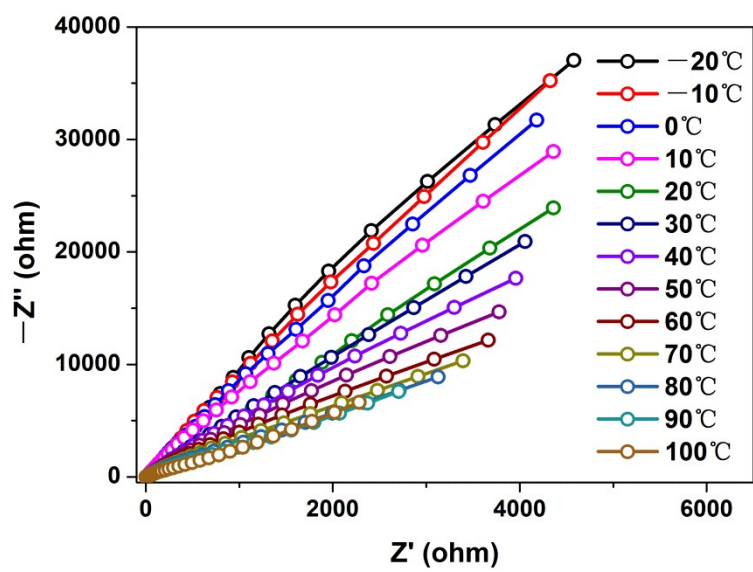

**Figure S4.** EIS of hollow ZIF-8 at temperature from  $-20$  to  $100^\circ\text{C}$ .

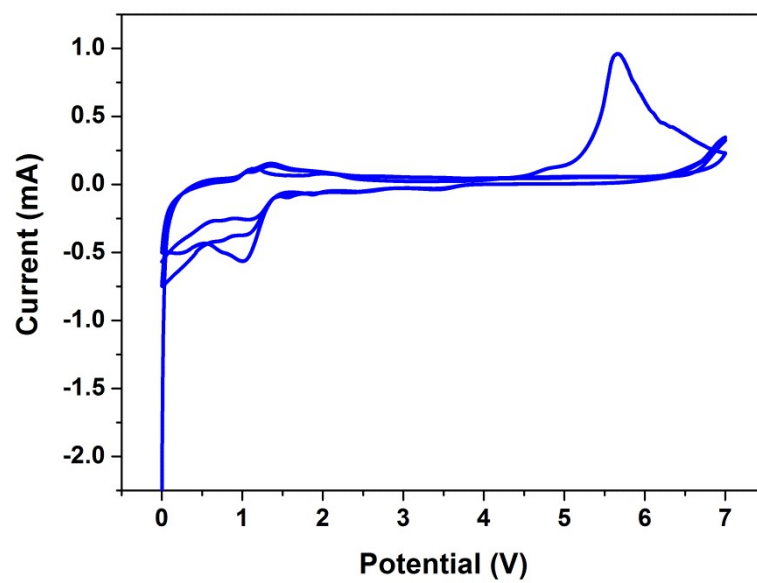

**Figure S5.** CV curves of ss/electrolyte membrane/Li cell of hollow ZIF-8.

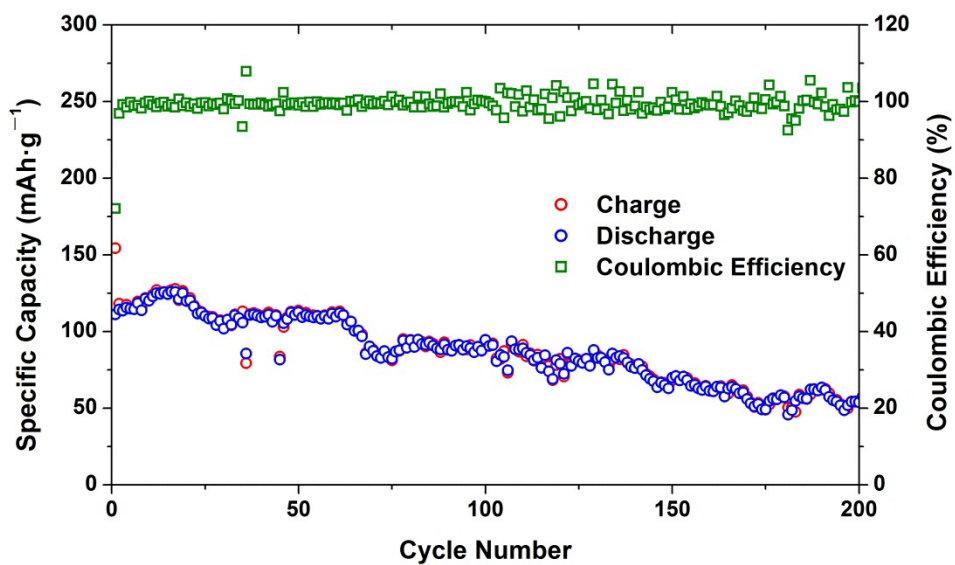

**Figure S6.** Specific capacity and coulombic efficiency of LiFePO<sub>4</sub>/electrolyte membrane/Li cell of hollow ZIF-8 with 0.1 C charge/discharge rate at room temperature.



**Table S1.** Comparison of MOFs for solid-state lithium ion conduction at room temperature

| No.      | Materials                         | ionic conductivity<br>( $\sigma$ )                                     | transference<br>number ( $t_{Li^+}$ ) | Ref.             |
|----------|-----------------------------------|------------------------------------------------------------------------|---------------------------------------|------------------|
| 1        | Li-IL@UIO-67-LLZO <sup>a, b</sup> | $1.0 \times 10^{-4} \text{ S} \cdot \text{cm}^{-1}$                    | 0.13                                  | 1                |
| 2        | UIO/Li-IL (15/16)                 | $3.2 \times 10^{-4} \text{ S} \cdot \text{cm}^{-1}$                    | 0.33                                  | 2                |
| 3        | Al-Td-MOF-1                       | $5.7 \times 10^{-5} \text{ S} \cdot \text{cm}^{-1}$                    | -                                     | 3                |
| 4        | MOF-688                           | $3.4 \times 10^{-4} \text{ S} \cdot \text{cm}^{-1}$                    | 0.87                                  | 4                |
| 5        | Li-IL@MOF-525                     | $3.0 \times 10^{-4} \text{ S} \cdot \text{cm}^{-1}$                    | 0.36                                  | 5                |
| <b>6</b> | <b>Hollow ZIF-8</b>               | <b><math>7.36 \times 10^{-4} \text{ S} \cdot \text{cm}^{-1}</math></b> | <b>0.83</b>                           | <b>This work</b> |

<sup>a</sup> Li-IL = lithium-containing ionic liquid

<sup>b</sup> LLZO =  $\text{Li}_7\text{La}_3\text{Zr}_2\text{O}_{12}$

## References

1. Z. Wang, Z. Wang, L. Yang, H. Wang, Y. Song, L. Han, K. Yang, J. Hu, H. Chen and F. Pan, *Nano Energy*, 2018, **49**, 580-587.
2. J. F. Wu and X. Guo, *Small*, 2019, **15**, 1804413.
3. S. Fischer, J. Roeser, T. C. Lin, R. H. DeBlock, J. Lau, B. S. Dunn, F. Hoffmann, M. Fröba, A. Thomas, S. H. Tolbert, M. Fröba, A. Thomas and S. H. Tolbert, *Angew. Chem. Int. Ed.*, 2018, **57**, 16683-16687.
4. W. Xu, X. Pei, C. S. Diercks, H. Lyu, Z. Ji and O. M. Yaghi, *J. Am. Chem. Soc.*, 2019, **141**, 17522-17526.
5. Z. Wang, R. Tan, H. Wang, L. Yang, J. Hu, H. Chen and F. Pan, *Adv. Mater.*, 2018, **30**, 1704436.
